# Supplementary material for: Operando XANES from first-principles and its application to iridium oxide
Source: Royal Society of Chemistry journal article supplement (doi:10.1039/c9cp06726d), 2020-01-01
Supplement: c9cp06726d1.pdf [file c9cp06726d1.pdf]

# *Operando* XANES from first-principles and its application to iridium oxide

Francesco Nattino\* and Nicola Marzari

*Theory and Simulations of Materials (THEOS) and National Centre for Computational  
Design and Discovery of Novel Materials (MARVEL), École Polytechnique Fédérale de  
Lausanne, CH-1015 Lausanne, Switzerland.*

E-mail: francesco.nattino@epfl.ch

## Electronic Supplementary Information

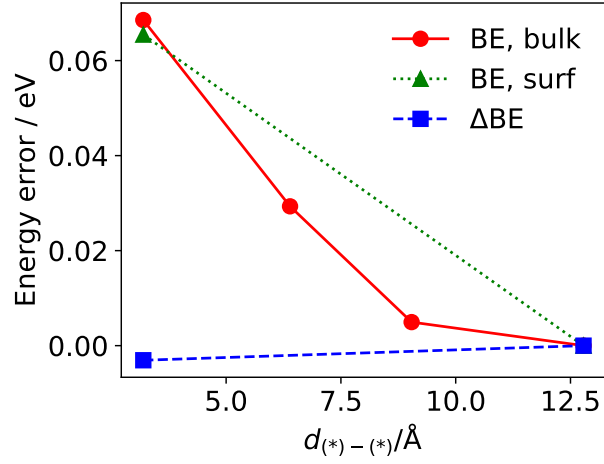

Figure S1: The convergence of the O 1s core-electron binding energies (BE's) is investigated as a function of the minimum distance between periodic replicas of the core-excited atom. Absolute binding energies for bulk ( $\text{BE}_{\text{bulk}}$ , red) and surface ( $\text{BE}_{\text{surf}}$ , green) atoms are considered, as well as the relative binding energy:  $\Delta\text{BE} = \text{BE}_{\text{surf}} - \text{BE}_{\text{bulk}}$ . A (110) slab has been employed for the convergence test.

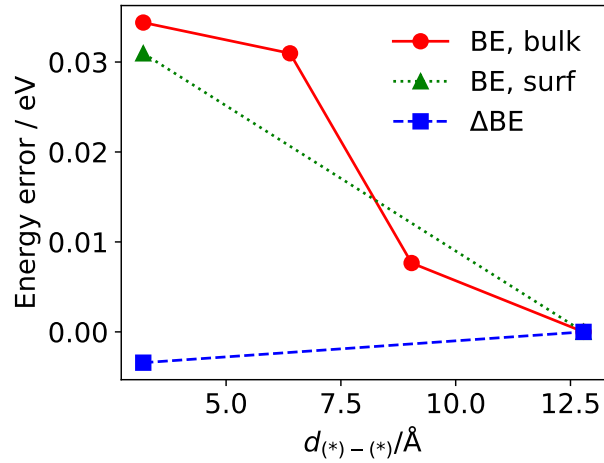

Figure S2: Same as Figure S1, but the Ir 2p core-electron BE's are considered instead.

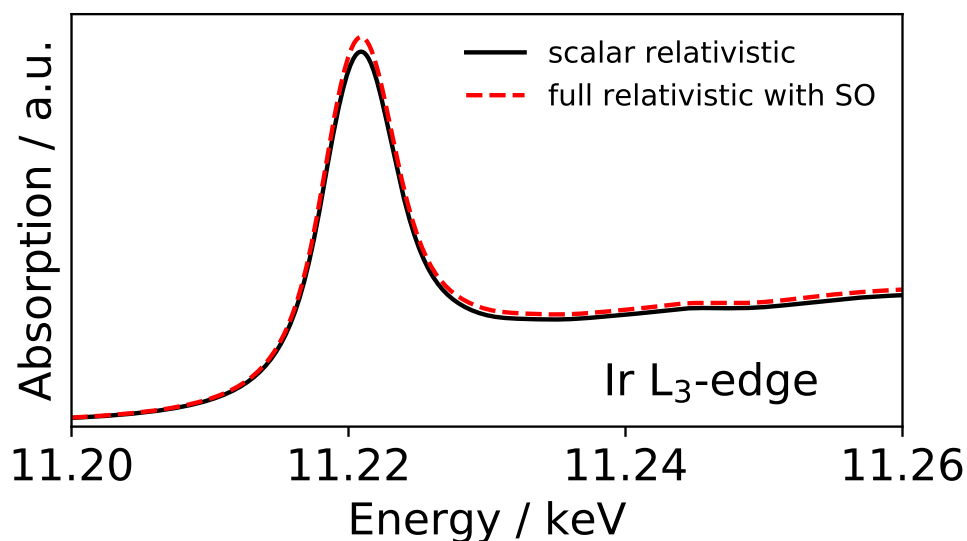

Figure S3: The Ir  $L_3$ -edge absorption cross-section computed using as initial state the  $2p$  reconstructed all-electron wave function determined using scalar relativistic calculations (solid black) is compared to the cross-section computed using the  $2p_{3/2}$  core state from full relativistic calculations that accounts for spin-orbit (SO) coupling (dashed red). Bulk  $\text{IrO}_2$  has been employed for the test.

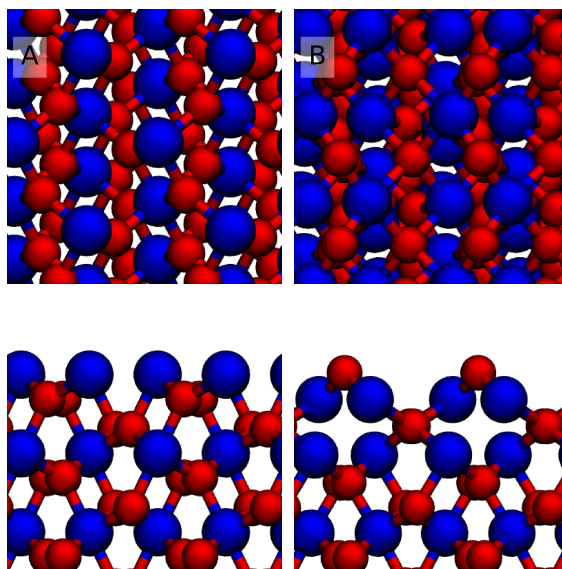

Figure S4: Top and side views of the considered Ir-rich (101) termination. Blue and red balls represent iridium and oxygen atoms, respectively. The two panels on the left (A) illustrate the bulk-truncated structure, while the reconstructed termination is sketched in the right panels (B).

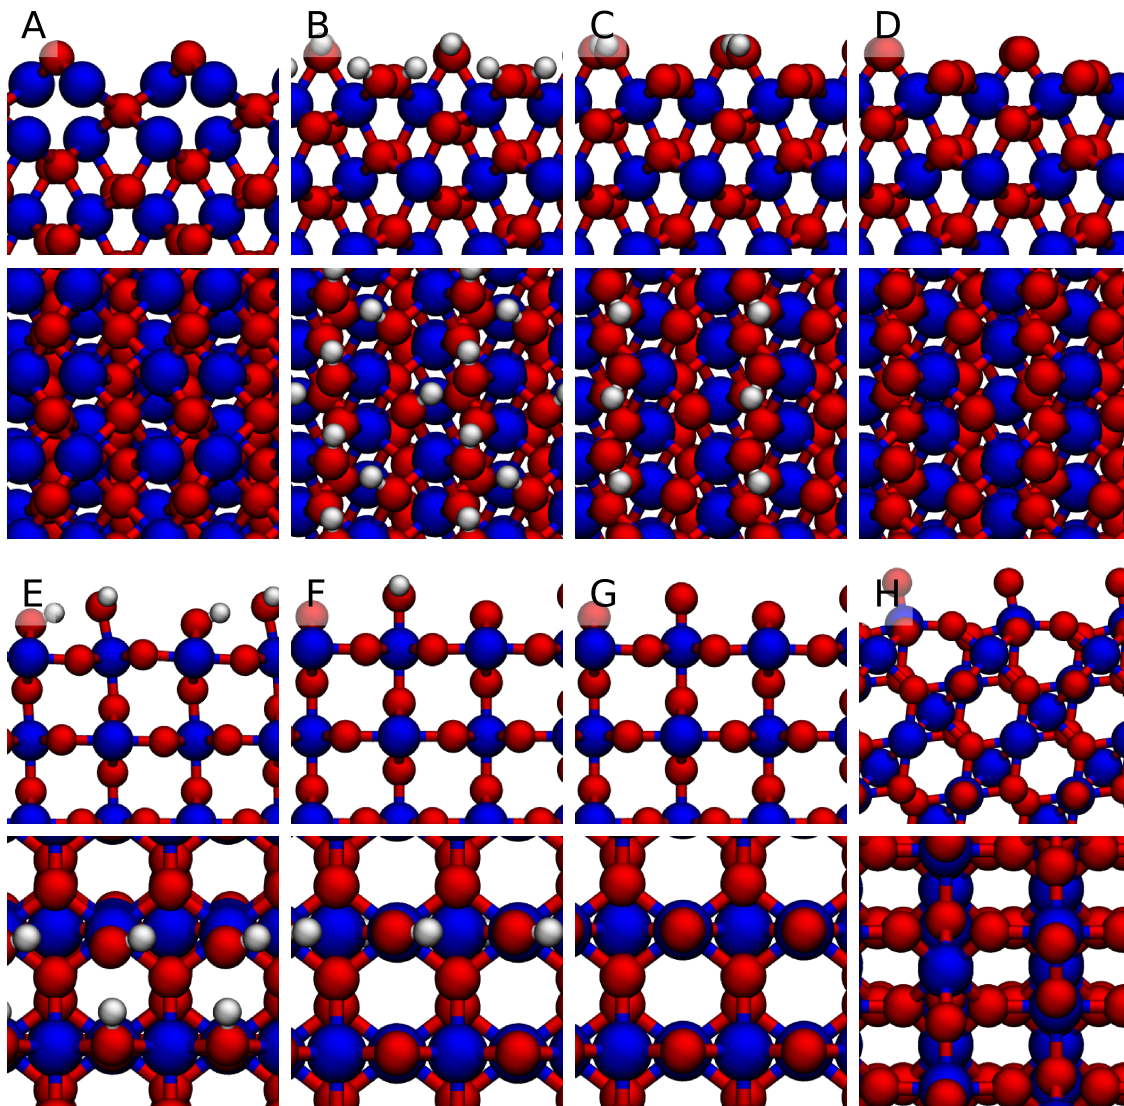

Figure S5: Top and side views of all interfaces for which XANES cross sections have been computed. (A-D): interfaces from the (101) orientation, i.e. the reconstructed iridium-rich surface (A), the OH-covered surface (B), the termination with OH groups at coordinatively-unsaturated (CU) sites (C), and the fully deprotonated surface (D). (E-G): interfaces from the (110) orientation, i.e. the OH-covered surface (E), the termination with OH groups at CU sites (F), and the fully deprotonated surface (G). (H): interface from the (111) orientation, i.e. the surface with an O atom adsorbed at the CU site. The coloring of atoms is as in Figure S4.

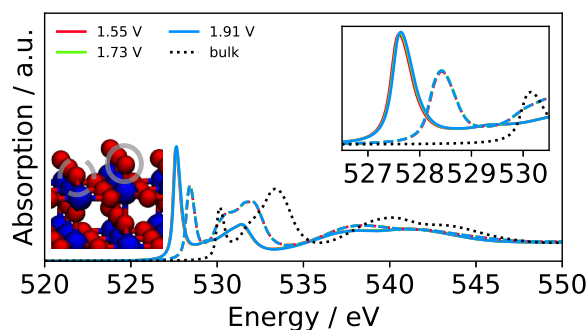

Figure S6: Oxygen K-edge XANES cross sections computed for the fully-oxidized (110) surface. A sketch of the termination is presented in the inset on the left, with blue and red balls indicating iridium and oxygen atoms, respectively. The absorbing atoms are highlighted with a grey circle. The insets on the right include a magnification of the white-line peak region. The various colors identify different potential conditions (curves are to a large extent superimposed).

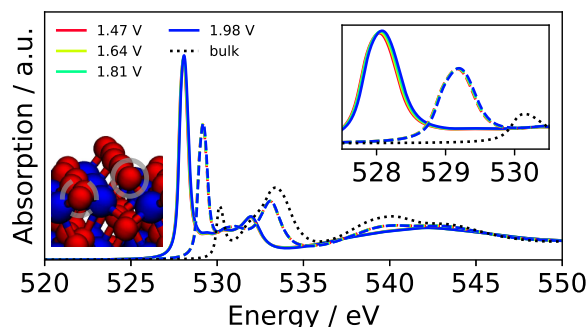

Figure S7: Same as Figure S6, but the absorbing atoms are selected from the fully-oxidized (101) surface.

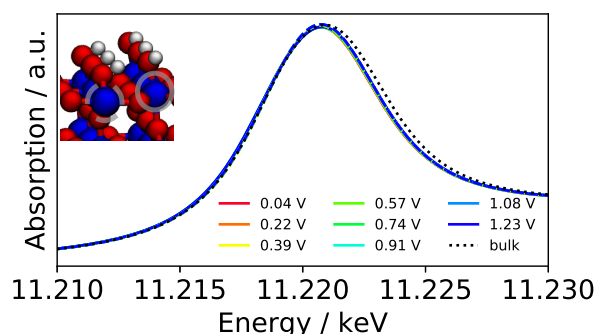

Figure S8: Iridium  $L_3$ -edge XANES cross sections computed for the indicated absorbing atoms of the OH-covered (110) surface. The various colors identify different potential conditions (curves are to a large extent superimposed).

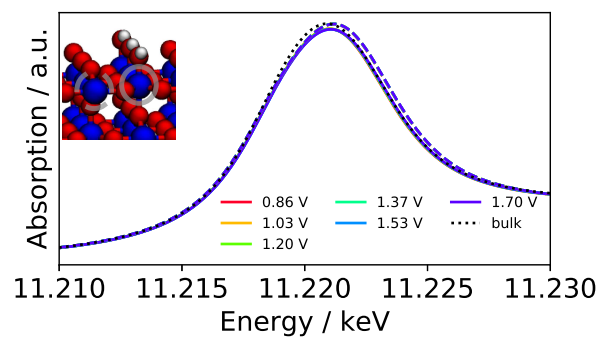

Figure S9: Same as Figure S8, but the absorbing atoms are selected from a (110) termination with OH groups at the CU sites.

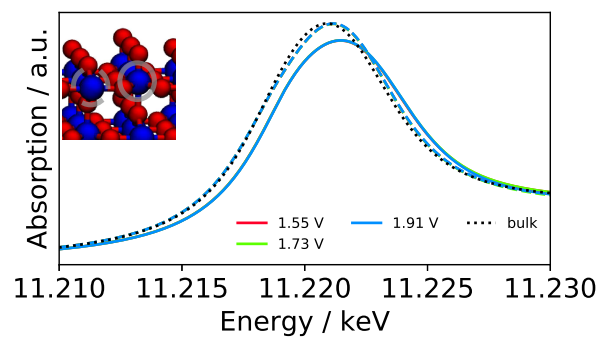

Figure S10: Same as Figure S8, but the absorbing atoms are selected from the fully-oxidized (110) surface.

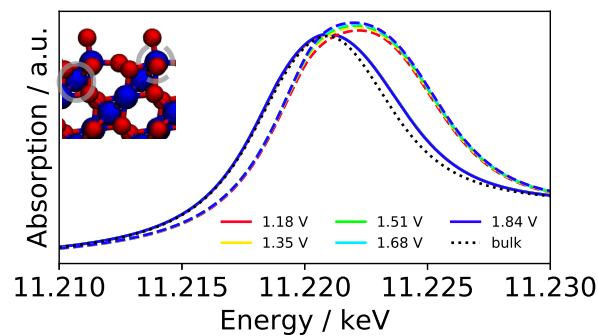

Figure S11: Same as Figure S8, but the absorbing atoms are selected from a (111) termination with an oxygen atom adsorbed at the CU site.
